# Supplementary material for: Chronic pain diagnosis in refugee torture survivors: A prospective, blinded diagnostic accuracy study
Source: PubMed Central journal article supplement (PMC7274371; doi:10.1371/journal.pmed.1003108), 2020-06-05
Supplement: pmed.1003108.s003.pdf [file pmed.1003108.s003.pdf]

**Chronic pain diagnosis in refugee torture survivors: a prospective,  
blinded, diagnostic accuracy study**  
PI: Gunisha Kaur, M.D. M.A.

Study ID: \_\_\_\_  
Subject Initials: \_\_\_\_  
Date: \_\_\_\_ / \_\_\_\_ / \_\_\_\_

# Chronic pain diagnosis in refugee torture survivors: a prospective, blinded, diagnostic accuracy study

Subject Number

Subject Initials

Date Enrolled: \_\_\_\_\_

Site Location: \_\_\_\_\_

Completed By: \_\_\_\_\_

**Chronic pain diagnosis in refugee torture survivors: a prospective,  
blinded, diagnostic accuracy study**  
PI: Gunisha Kaur, M.D. M.A.

Study ID: \_\_\_\_  
Subject Initials: \_\_\_\_  
Date: \_\_\_\_ / \_\_\_\_ / \_\_\_\_

**CHIEF COMPLAINT:**

---

---

---

---

---

---

---

---

**DEMOGRAPHICS:**

Age: \_\_\_\_\_ Years Old

Sex: M F Other

**Ethnicity:**

- White       Hispanic/Latino       Black/African American       Native American/American Indian  
 Asian/Pacific Islander       Other \_\_\_\_\_

**Highest Education Achieved:**

- Some High School       High school graduate (or equivalent)       Some college  
 Trade/technical/vocational training       College Graduate       Post Graduate Degree

**Professional or Employment Status**

- Full Time       Part Time       Not Employed       Retired       Student

**HISTORY OF PRESENT ILLNESS**

**Current Pain Intensity:**     None       Mild     Moderate     Severe ---  Increasing      
Decreasing

**Pain Body Parts:**

- |                                                   |                                              |                                            |                                           |
|---------------------------------------------------|----------------------------------------------|--------------------------------------------|-------------------------------------------|
| <input type="checkbox"/> Upper Back (L□ /R□)      | <input type="checkbox"/> Lower Back (L□ /R□) | <input type="checkbox"/> Buttock (L□ /R□)  | <input type="checkbox"/> Leg (L□ /R□)     |
| <input type="checkbox"/> Neck (L□ /R□)            | <input type="checkbox"/> Arm (L□ /R□)        | <input type="checkbox"/> Shoulder (L□ /R□) | <input type="checkbox"/> Hip (L□ /R□)     |
| <input type="checkbox"/> Knee (L□ /R□)            | <input type="checkbox"/> Ankle (L□ /R□)      | <input type="checkbox"/> Foot (L□ /R□)     | <input type="checkbox"/> Abdomen (L□ /R□) |
| <input type="checkbox"/> Groin (L□ /R□)           | <input type="checkbox"/> Flank (L□ /R□)      | <input type="checkbox"/> Face (L□ /R□)     | <input type="checkbox"/> Head (L□ /R□)    |
| <input type="checkbox"/> Occipital Scalp (L□ /R□) | <input type="checkbox"/> Chest Wall (L□ /R□) |                                            |                                           |

**Chronic pain diagnosis in refugee torture survivors: a prospective,  
blinded, diagnostic accuracy study**  
PI: Gunisha Kaur, M.D. M.A.

Study ID: \_\_\_\_  
Subject Initials: \_\_\_\_  
Date: \_\_\_\_ / \_\_\_\_ / \_\_\_\_

**Duration of Pain:** \_\_\_\_\_  Hours  Days  Weeks  Months  Years

**Frequency of Pain:**

- Constant  Intermittent  Intermittent with Exacerbation  
 Worse in Morning  Worse During Day  Worse in Evening  Worse at Night  
 Worse on Weekends  Worse in Winter  No Pattern  Worse after \_\_\_\_\_

**Description/Quality of Pain:**

- Constant  Intermittent  Burning  Sharp  
 Dull  Stabbing  Tender  Tingling  
 Aching  Shooting  Sore  Throbbing

**Additional Comments:**

---

---

---

**Pain Intensity with Activity (0 – 10):** \_\_\_\_\_

**Pain Intensity at Rest (0 – 10):** \_\_\_\_\_

**Highest Pain Intensity in the Last 24 Hours (0 – 10):** \_\_\_\_\_

**Lowest Pain Intensity in the Last 24 Hours (0 – 10):** \_\_\_\_\_

**Average Pain Intensity in the Last 24 Hours (0 – 10):** \_\_\_\_\_

**Average Pain Intensity in the Last Week (0 – 10):** \_\_\_\_\_

**What causes pain to increase?:**

- Activity  Cold  Coughing  Deep Breaths  Defecation  
 Eating  Heat  Laying Supine  Sitting  Sneezing  
 Standing  Urination  Valsalva  Walking

**What causes pain to decrease?:**

- Cold  Heat  Laying Supine  Massage  Sitting  
 Standing  Walking  Medications  Rest

**How does the pain affect activities of daily living?:**

- Difficult  Requires Assistance  Impossible  Not a problem

**Have you seen other doctors for this pain?:**  No  Yes \_\_\_\_\_

**DIAGNOSES/TREATMENTS RELATED TO THIS PAIN:**

**Chronic pain diagnosis in refugee torture survivors: a prospective,  
blinded, diagnostic accuracy study**  
PI: Gunisha Kaur, M.D. M.A.

Study ID: \_\_\_ \_\_\_ \_\_\_  
Subject Initials: \_\_\_ \_\_\_ \_\_\_  
Date: \_\_\_ / \_\_\_ / \_\_\_\_\_

**PAST MEDICAL HISTORY:**

---

---

---

**PAST SURGICAL HISTORY:**

---

---

---

**PAST FAMILY HISTORY:**

---

---

---

**PAST SOCIAL HISTORY:**

---

---

---

**MEDICATIONS:**

---

---

---

**ALLERGIES:**

---

---

---

Chronic pain diagnosis in refugee torture survivors: a prospective,  
 blinded, diagnostic accuracy study  
 PI: Gunisha Kaur, M.D. M.A.

Study ID: \_\_\_\_  
 Subject Initials: \_\_\_\_  
 Date: \_\_\_\_ / \_\_\_\_ / \_\_\_\_

## REVIEW OF SYSTEMS

---



---



---



---



---



---



---



---



---



---

## PHYSICAL EXAM

|                                                                                                                                                                                                                                                                                                                                                                                                          |                                                                                                                                                                                                                                                                                                                                                                                                                                                                                                                                                 |
|----------------------------------------------------------------------------------------------------------------------------------------------------------------------------------------------------------------------------------------------------------------------------------------------------------------------------------------------------------------------------------------------------------|-------------------------------------------------------------------------------------------------------------------------------------------------------------------------------------------------------------------------------------------------------------------------------------------------------------------------------------------------------------------------------------------------------------------------------------------------------------------------------------------------------------------------------------------------|
| <p><b><u>HEAD:</u></b><br/> <b>NCAT:</b> <input type="checkbox"/> Yes <input type="checkbox"/> No<br/> <b>Alopecia:</b> <input type="checkbox"/> Yes <input type="checkbox"/> No</p>                                                                                                                                                                                                                     | <p><b><u>EMNT:</u></b><br/> <b>External Inspection of Ear and Nose:</b> <input type="checkbox"/> Normal <input type="checkbox"/> Abnormal</p>                                                                                                                                                                                                                                                                                                                                                                                                   |
| <p><b><u>EYES:</u></b><br/> <b>PERRL:</b> <input type="checkbox"/> Yes <input type="checkbox"/> No<br/> <b>Extraocular Muscles Intact</b> <input type="checkbox"/> Yes <input type="checkbox"/> No<br/> <b>Sclerae:</b> <input type="checkbox"/> Normal <input type="checkbox"/> Icterus</p>                                                                                                             | <p><b>Lips, Teeth, and Gums:</b> <input type="checkbox"/> Normal <input type="checkbox"/> Poor Dentition<br/> <b>Oropharynx Exam:</b> <input type="checkbox"/> Erythema<br/> <input type="checkbox"/> Oral Pharynx Clear Without Erythema or Exudates</p>                                                                                                                                                                                                                                                                                       |
| <p><b><u>NECK:</u></b><br/> <b>General Neck Exam:</b><br/> <input type="checkbox"/> Normal <input type="checkbox"/> Trachea Midline<br/> <input type="checkbox"/> Full ROM <input type="checkbox"/> No Lymphadenopathy<br/> <b>Thyromegaly</b> <input type="checkbox"/> Yes <input type="checkbox"/> No<br/> <b>Thyroid Palpable Nodule</b> <input type="checkbox"/> Yes <input type="checkbox"/> No</p> | <p><b><u>RESPIRATORY:</u></b><br/> <b>Respiratory Effort:</b><br/> <input type="checkbox"/> Normal <input type="checkbox"/> Using Accessory Muscles<br/> <input type="checkbox"/> Labored Breathing<br/> <b>Auscultation of Lungs:</b><br/> <input type="checkbox"/> Lungs Clear <input type="checkbox"/> Crackles <input type="checkbox"/> Rhonchi<br/> <input type="checkbox"/> Wheezing <input type="checkbox"/> ↓ Sound Breaths at R Base<br/> <input type="checkbox"/> Friction Rub <input type="checkbox"/> ↓ Sound Breaths at L Base</p> |



**Chronic pain diagnosis in refugee torture survivors: a prospective,  
blinded, diagnostic accuracy study  
PI: Gunisha Kaur, M.D. M.A.**

Study ID: \_\_\_\_\_  
Subject Initials: \_\_\_\_\_  
Date: \_\_\_ / \_\_\_ / \_\_\_\_\_

**MUSCULOSKELETAL:**

**Facet Tenderness**

**Cervical:**

Absent       Mild       Moderate       Severe  
 Left       Right       Bilaterally

**Thoracic:**

Absent       Mild       Moderate       Severe  
 Left       Right       Bilaterally

**Lumbar:**

Absent       Mild       Moderate       Severe  
 Left       Right       Bilaterally

**Sacroiliac:**

Absent       Mild       Moderate       Severe  
 Left       Right       Bilaterally

**Greater Trochanteric Bursa:**

Present       Not Present

Left       Right       Bilaterally

**Piriformis:**

Present       Not Present

Left       Right       Bilaterally

**EXTREMITIES:**

**Digits:**

Normal       No Clubbing       No Cyanosis

**Upper Extremities:**

Normal       Abnormal

**Lower Extremities:**

Normal       Abnormal

**Edema:**

+1       +2

**Upper Extremity Power**

**C5 Elbow Flexion**

1     2     3     4     5  
 Left       Right       Bilaterally

**C6 Wrist Extension**

1     2     3     4     5  
 Left       Right       Bilaterally

**C7 Elbow Extension**

1     2     3     4     5  
 Left       Right       Bilaterally

**C8 Finger Extension**

1     2     3     4     5  
 Left       Right       Bilaterally

**T1 Finger Abduction**

1     2     3     4     5  
 Left       Right       Bilaterally





**Chronic pain diagnosis in refugee torture survivors: a prospective,  
blinded, diagnostic accuracy study  
PI: Gunisha Kaur, M.D. M.A.**

Study ID: \_\_\_\_  
Subject Initials: \_\_\_\_  
Date: \_\_\_\_ / \_\_\_\_ / \_\_\_\_

**MENTAL STATUS:**

- Orientation:**       Alert                       Oriented x3
- Affect:**             Normal                       Blunted                       Flat  
                          Labile                       Anxious                       Fearful                       Tearful
- Mood:**              Euthymic                       Sad                       Depressed  
                          Manic                       Euphoric                       Angry
- Memory:**         Normal                       Abnormal

**JOINT PAIN EXAM:**

---

---

---

**OTHER TESTS:**

---

---

---

**Chronic pain diagnosis in refugee torture survivors: a prospective,  
blinded, diagnostic accuracy study**  
PI: Gunisha Kaur, M.D. M.A.

Study ID: \_\_\_\_  
Subject Initials: \_\_\_\_  
Date: \_\_\_\_ / \_\_\_\_ / \_\_\_\_

**FINAL ASSESSMENT**

**Assessment:**

---

---

**Diagnosis:**

---

---

**Chronic Pain**  Yes  No

**PAIN:**

**ICD 10 Code:**  None

**Pain Location(s):**  None

**Type of Pain:**  None

---

**Mechanism of Injury:**  N/A

---

---

**Pain consistent with mechanism of Injury:**  Yes  No  N/A

**Secondary Injury:**  No  Yes (please elaborate):

---

---

**Medical Treatment for Pain:**  N/A

---

---

**Physical Deformities:**  No  Yes (please elaborate):

---

---

**Confounding Medical Conditions:**  No  Yes (please elaborate):

---
